# Supplementary material
Source: publisher figshare collection journal article supplement (https://tandf.figshare.com/ndownloader/files/18526934)
Supplement: Supplementary file 1 [file 18526934]

Mycotoxins accumulation showed significant positive correlation to disease severity during *Fusarium* Head Blight infection in wheat using *in vitro* spike culture technique

CHEN HUANG, MANU P. GANGOLA AND RAVINDRA N. CHIBBAR


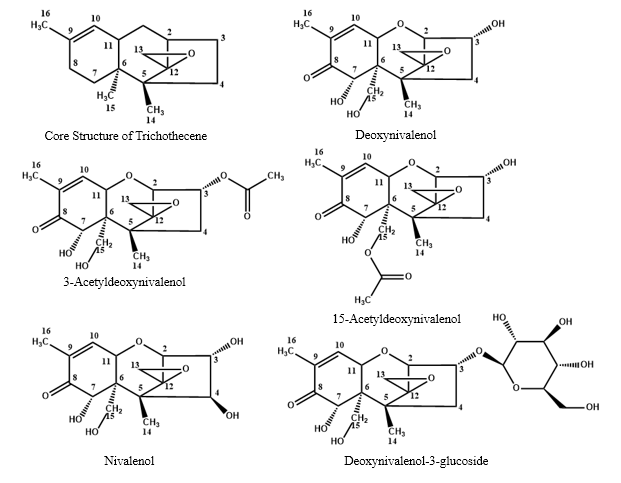


**Fig. S1** Chemical structures of analyzed mycotoxins produced during *Fusarium* head blight in wheat


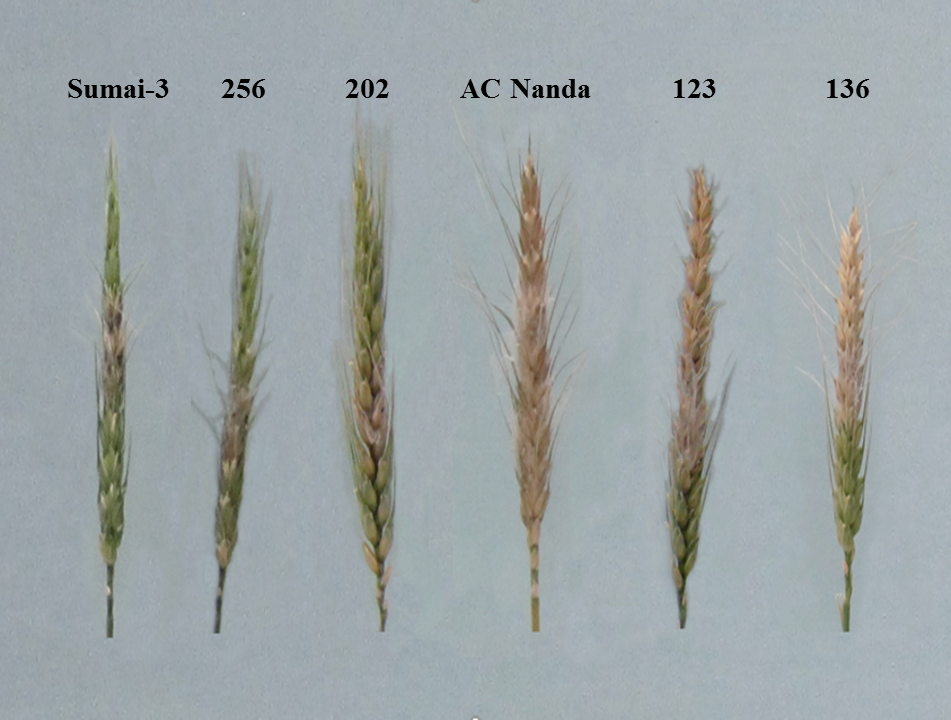


**Fig. S2** *In vitro* spike culture showing difference between FHB resistant (Sumai-3 256 and 202) and FHB susceptible (AC Nanda, 123 and 136) genotypes
